# Supplementary material for: The Self-Awareness Multilevel Assessment Scale, a New Tool for the Assessment of Self-Awareness After Severe Acquired Brain Injury: Preliminary Findings
Source: PubMed Central journal article supplement (PMC7393213; doi:10.3389/fpsyg.2020.01732), 2020-07-24
Supplement: Data_Sheet_1.pdf [file Data_Sheet_1.pdf]

## Self-Awareness Multilevel Assessment Scale

U. Bivona\*, P. Ciurli, G. Ferri, T. Fontanelli, S. Lucatello, T. Donvito, D. Villalobos, L. Cellupica, F. Mungiello, P. Lo Sterzo, A. Ferraro, E. Giandotti, G. Lombardi, E. Azicnuda, C. Caltagirone, Rita Formisano, and A. Costa

\*u.bivona@hsantalucia.it

| DECLARATIVE self-awareness |                                                                                                                                                                                                                                                                                                                                                                                                               | Yes<br>(0)                                                                                                   | With<br>cue<br>(1)                                                                                           | No<br>(2)                                                                                                    | N.A                                                                                                          |
|----------------------------|---------------------------------------------------------------------------------------------------------------------------------------------------------------------------------------------------------------------------------------------------------------------------------------------------------------------------------------------------------------------------------------------------------------|--------------------------------------------------------------------------------------------------------------|--------------------------------------------------------------------------------------------------------------|--------------------------------------------------------------------------------------------------------------|--------------------------------------------------------------------------------------------------------------|
|                            | <p>Patient <b>recognizes the presence of current difficulties</b> (specify the difficulties already known to the patient on the <b>basis of the NPS report</b>, highlighted by <b>clinical observation</b> or reported by the caregiver):</p> <p><i>Motor:</i> _____</p> <p><i>Cognitive:</i> _____</p> <p><i>Psycho-behavioural:</i> _____</p> <p><i>Others (specify which ones):</i> _____</p> <p>_____</p> | <input type="checkbox"/><br><input type="checkbox"/><br><input type="checkbox"/><br><input type="checkbox"/> | <input type="checkbox"/><br><input type="checkbox"/><br><input type="checkbox"/><br><input type="checkbox"/> | <input type="checkbox"/><br><input type="checkbox"/><br><input type="checkbox"/><br><input type="checkbox"/> | <input type="checkbox"/><br><input type="checkbox"/><br><input type="checkbox"/><br><input type="checkbox"/> |
|                            | <p>Patient recognizes the <b>functional implications</b> of one's difficulties:</p> <p style="text-align: right;"><i>Motor</i></p> <p style="text-align: right;"><i>Cognitive</i></p> <p style="text-align: right;"><i>Psycho-behavioural</i></p> <p><i>Others</i> _____</p>                                                                                                                                  | <input type="checkbox"/><br><input type="checkbox"/><br><input type="checkbox"/><br><input type="checkbox"/> | <input type="checkbox"/><br><input type="checkbox"/><br><input type="checkbox"/><br><input type="checkbox"/> | <input type="checkbox"/><br><input type="checkbox"/><br><input type="checkbox"/><br><input type="checkbox"/> | <input type="checkbox"/><br><input type="checkbox"/><br><input type="checkbox"/><br><input type="checkbox"/> |

| EMERGENT self-awareness |                                                                                                                                                                                                                                                                           | Yes<br>(0)                                                                                                   | With<br>cue<br>(1)                                                                                           | No<br>(2)                                                                                                    | N.A                                                                                                          |
|-------------------------|---------------------------------------------------------------------------------------------------------------------------------------------------------------------------------------------------------------------------------------------------------------------------|--------------------------------------------------------------------------------------------------------------|--------------------------------------------------------------------------------------------------------------|--------------------------------------------------------------------------------------------------------------|--------------------------------------------------------------------------------------------------------------|
|                         | <p><b>When they occur</b>, patient <b>recognizes the presence of difficulties</b>:</p> <p><i>Motor (specify):</i> _____</p> <p><i>Cognitive (specify):</i> _____</p> <p><i>Psycho-behavioural (specify):</i> _____</p> <p><i>Others (specify):</i> _____</p> <p>_____</p> | <input type="checkbox"/><br><input type="checkbox"/><br><input type="checkbox"/><br><input type="checkbox"/> | <input type="checkbox"/><br><input type="checkbox"/><br><input type="checkbox"/><br><input type="checkbox"/> | <input type="checkbox"/><br><input type="checkbox"/><br><input type="checkbox"/><br><input type="checkbox"/> | <input type="checkbox"/><br><input type="checkbox"/><br><input type="checkbox"/><br><input type="checkbox"/> |

| ANTICIPATORY self-awareness                                                                                                                                                                                                                                                                                                            |                                                                                                              | Yes<br>(0)                                                                                                   | With<br>cue<br>(1)                                                                                           | No<br>(2)                                                                                                    | N.A |
|----------------------------------------------------------------------------------------------------------------------------------------------------------------------------------------------------------------------------------------------------------------------------------------------------------------------------------------|--------------------------------------------------------------------------------------------------------------|--------------------------------------------------------------------------------------------------------------|--------------------------------------------------------------------------------------------------------------|--------------------------------------------------------------------------------------------------------------|-----|
| Patient is able to <b>recognize the problematic nature of a task</b> with respect to his own deficits at the level: <p style="text-align: right;"><i>Motor</i></p> <p style="text-align: right;"><i>Cognitive</i></p> <p style="text-align: right;"><i>Psycho-behavioural</i></p> <p><i>Others</i> _____</p>                           | <input type="checkbox"/><br><input type="checkbox"/><br><input type="checkbox"/><br><input type="checkbox"/> | <input type="checkbox"/><br><input type="checkbox"/><br><input type="checkbox"/><br><input type="checkbox"/> | <input type="checkbox"/><br><input type="checkbox"/><br><input type="checkbox"/><br><input type="checkbox"/> | <input type="checkbox"/><br><input type="checkbox"/><br><input type="checkbox"/><br><input type="checkbox"/> |     |
| Patient is able to <b>set realistic goals</b> in relation to his own difficulties at level: <p style="text-align: right;"><i>Motor</i></p> <p style="text-align: right;"><i>Cognitive</i></p> <p style="text-align: right;"><i>Psycho-behavioural</i></p> <p><i>Others</i> _____</p>                                                   | <input type="checkbox"/><br><input type="checkbox"/><br><input type="checkbox"/><br><input type="checkbox"/> | <input type="checkbox"/><br><input type="checkbox"/><br><input type="checkbox"/><br><input type="checkbox"/> | <input type="checkbox"/><br><input type="checkbox"/><br><input type="checkbox"/><br><input type="checkbox"/> | <input type="checkbox"/><br><input type="checkbox"/><br><input type="checkbox"/><br><input type="checkbox"/> |     |
| Patient <b>declares the need for strategies</b> to avoid having difficulties at the level: <p style="text-align: right;"><i>Motor</i></p> <p style="text-align: right;"><i>Cognitive</i></p> <p style="text-align: right;"><i>Psycho-behavioural</i></p> <p><i>Others</i> _____</p>                                                    | <input type="checkbox"/><br><input type="checkbox"/><br><input type="checkbox"/><br><input type="checkbox"/> | <input type="checkbox"/><br><input type="checkbox"/><br><input type="checkbox"/><br><input type="checkbox"/> | <input type="checkbox"/><br><input type="checkbox"/><br><input type="checkbox"/><br><input type="checkbox"/> | <input type="checkbox"/><br><input type="checkbox"/><br><input type="checkbox"/><br><input type="checkbox"/> |     |
| Patient <b>effectively uses</b> strategies to avoid having difficulty at the level: <p style="text-align: right;"><i>Motor</i></p> <p style="text-align: right;"><i>Cognitive</i></p> <p style="text-align: right;"><i>Psycho-behavioural</i></p> <p><i>Others</i> _____</p>                                                           | <input type="checkbox"/><br><input type="checkbox"/><br><input type="checkbox"/><br><input type="checkbox"/> | <input type="checkbox"/><br><input type="checkbox"/><br><input type="checkbox"/><br><input type="checkbox"/> | <input type="checkbox"/><br><input type="checkbox"/><br><input type="checkbox"/><br><input type="checkbox"/> | <input type="checkbox"/><br><input type="checkbox"/><br><input type="checkbox"/><br><input type="checkbox"/> |     |
| Using strategies in the rehabilitation context, patient is <b>able to generalize to all the contexts in which he/she acts</b> , at the level: <p style="text-align: right;"><i>Motor</i></p> <p style="text-align: right;"><i>Cognitive</i></p> <p style="text-align: right;"><i>Psycho-behavioural</i></p> <p><i>Others</i> _____</p> | <input type="checkbox"/><br><input type="checkbox"/><br><input type="checkbox"/><br><input type="checkbox"/> | <input type="checkbox"/><br><input type="checkbox"/><br><input type="checkbox"/><br><input type="checkbox"/> | <input type="checkbox"/><br><input type="checkbox"/><br><input type="checkbox"/><br><input type="checkbox"/> | <input type="checkbox"/><br><input type="checkbox"/><br><input type="checkbox"/><br><input type="checkbox"/> |     |
